# Supplementary material
Source: Springer Nature journal article supplement (https://www.springermedizin.de/resource/supplementary/12876_2009_444_MOESM5_ESM.pdf/9437026)

**A**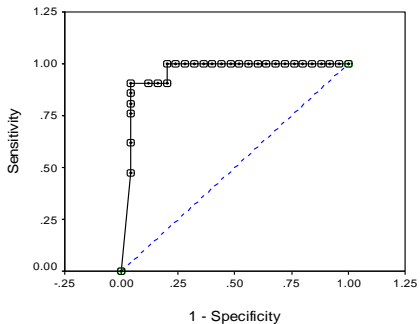

Diagonal segments are produced by ties.

**B**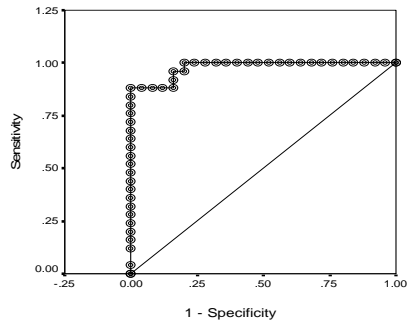**C**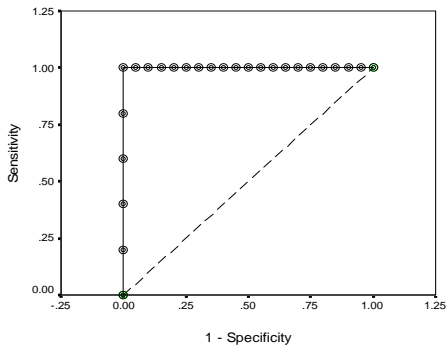**D**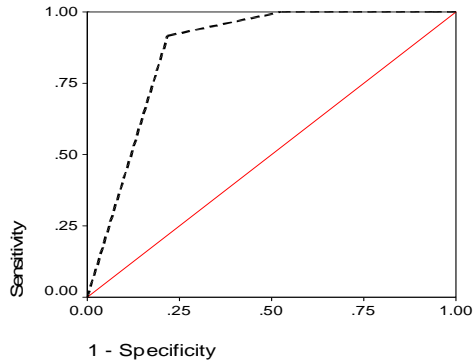

Supplement: MOESM5 [file 9437026]
